# Supplementary material
Source: publisher site journal article supplement (https://www.dovepress.com/get_supplementary_file.php?f=276504.docx)

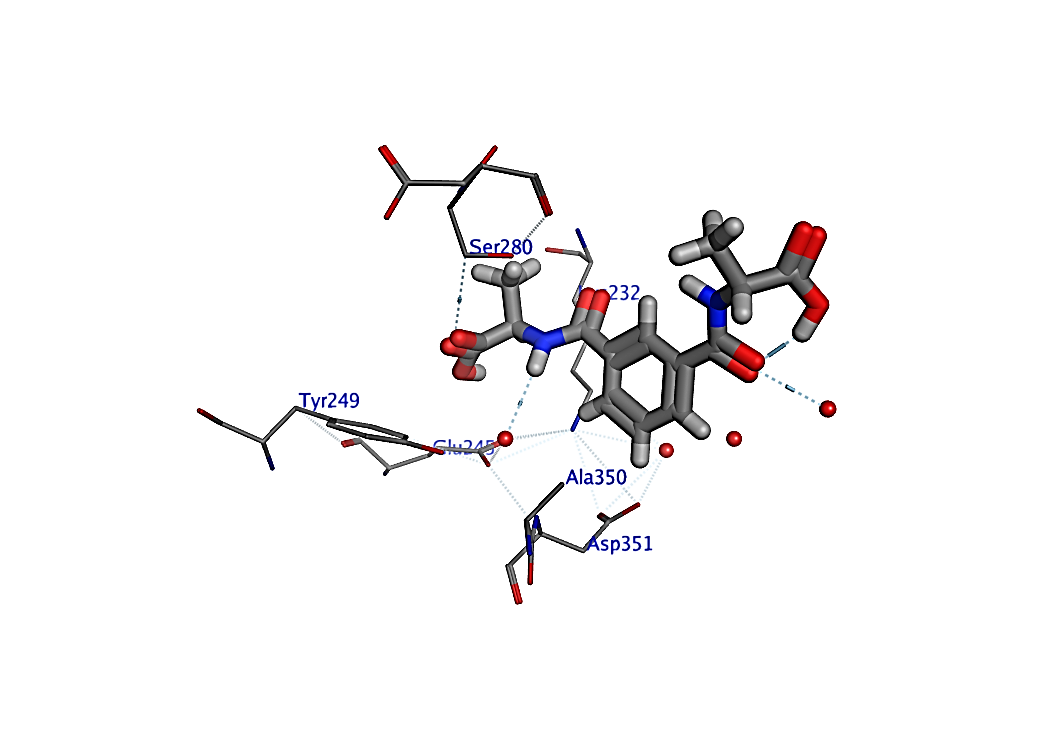


**5**


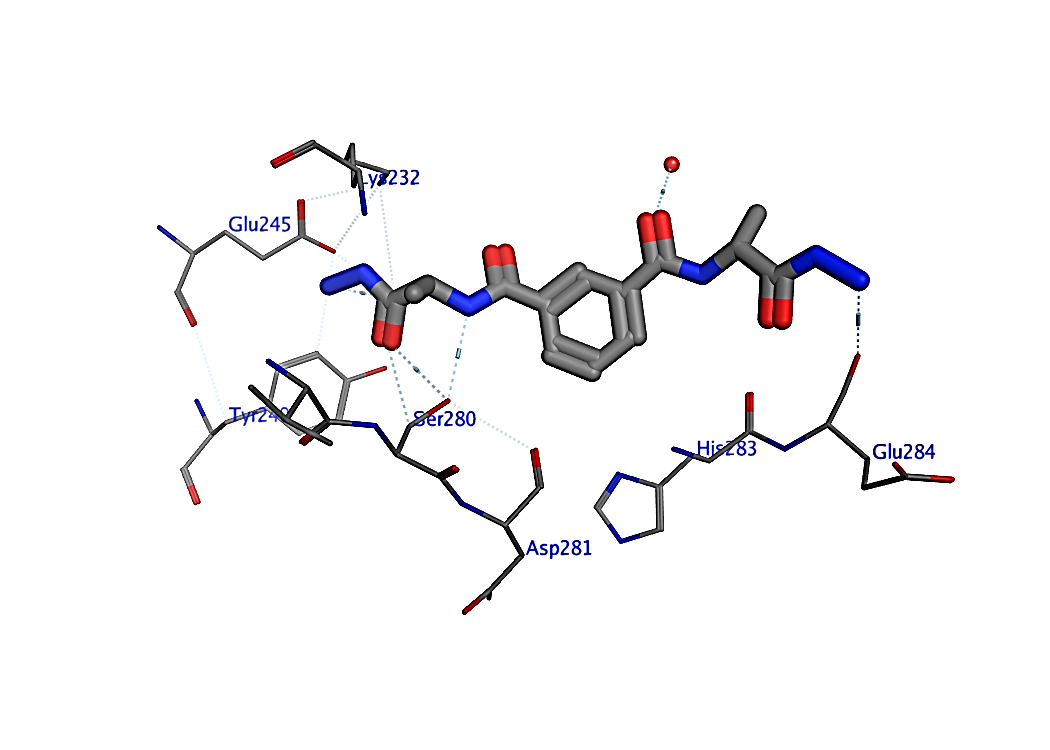


**7**


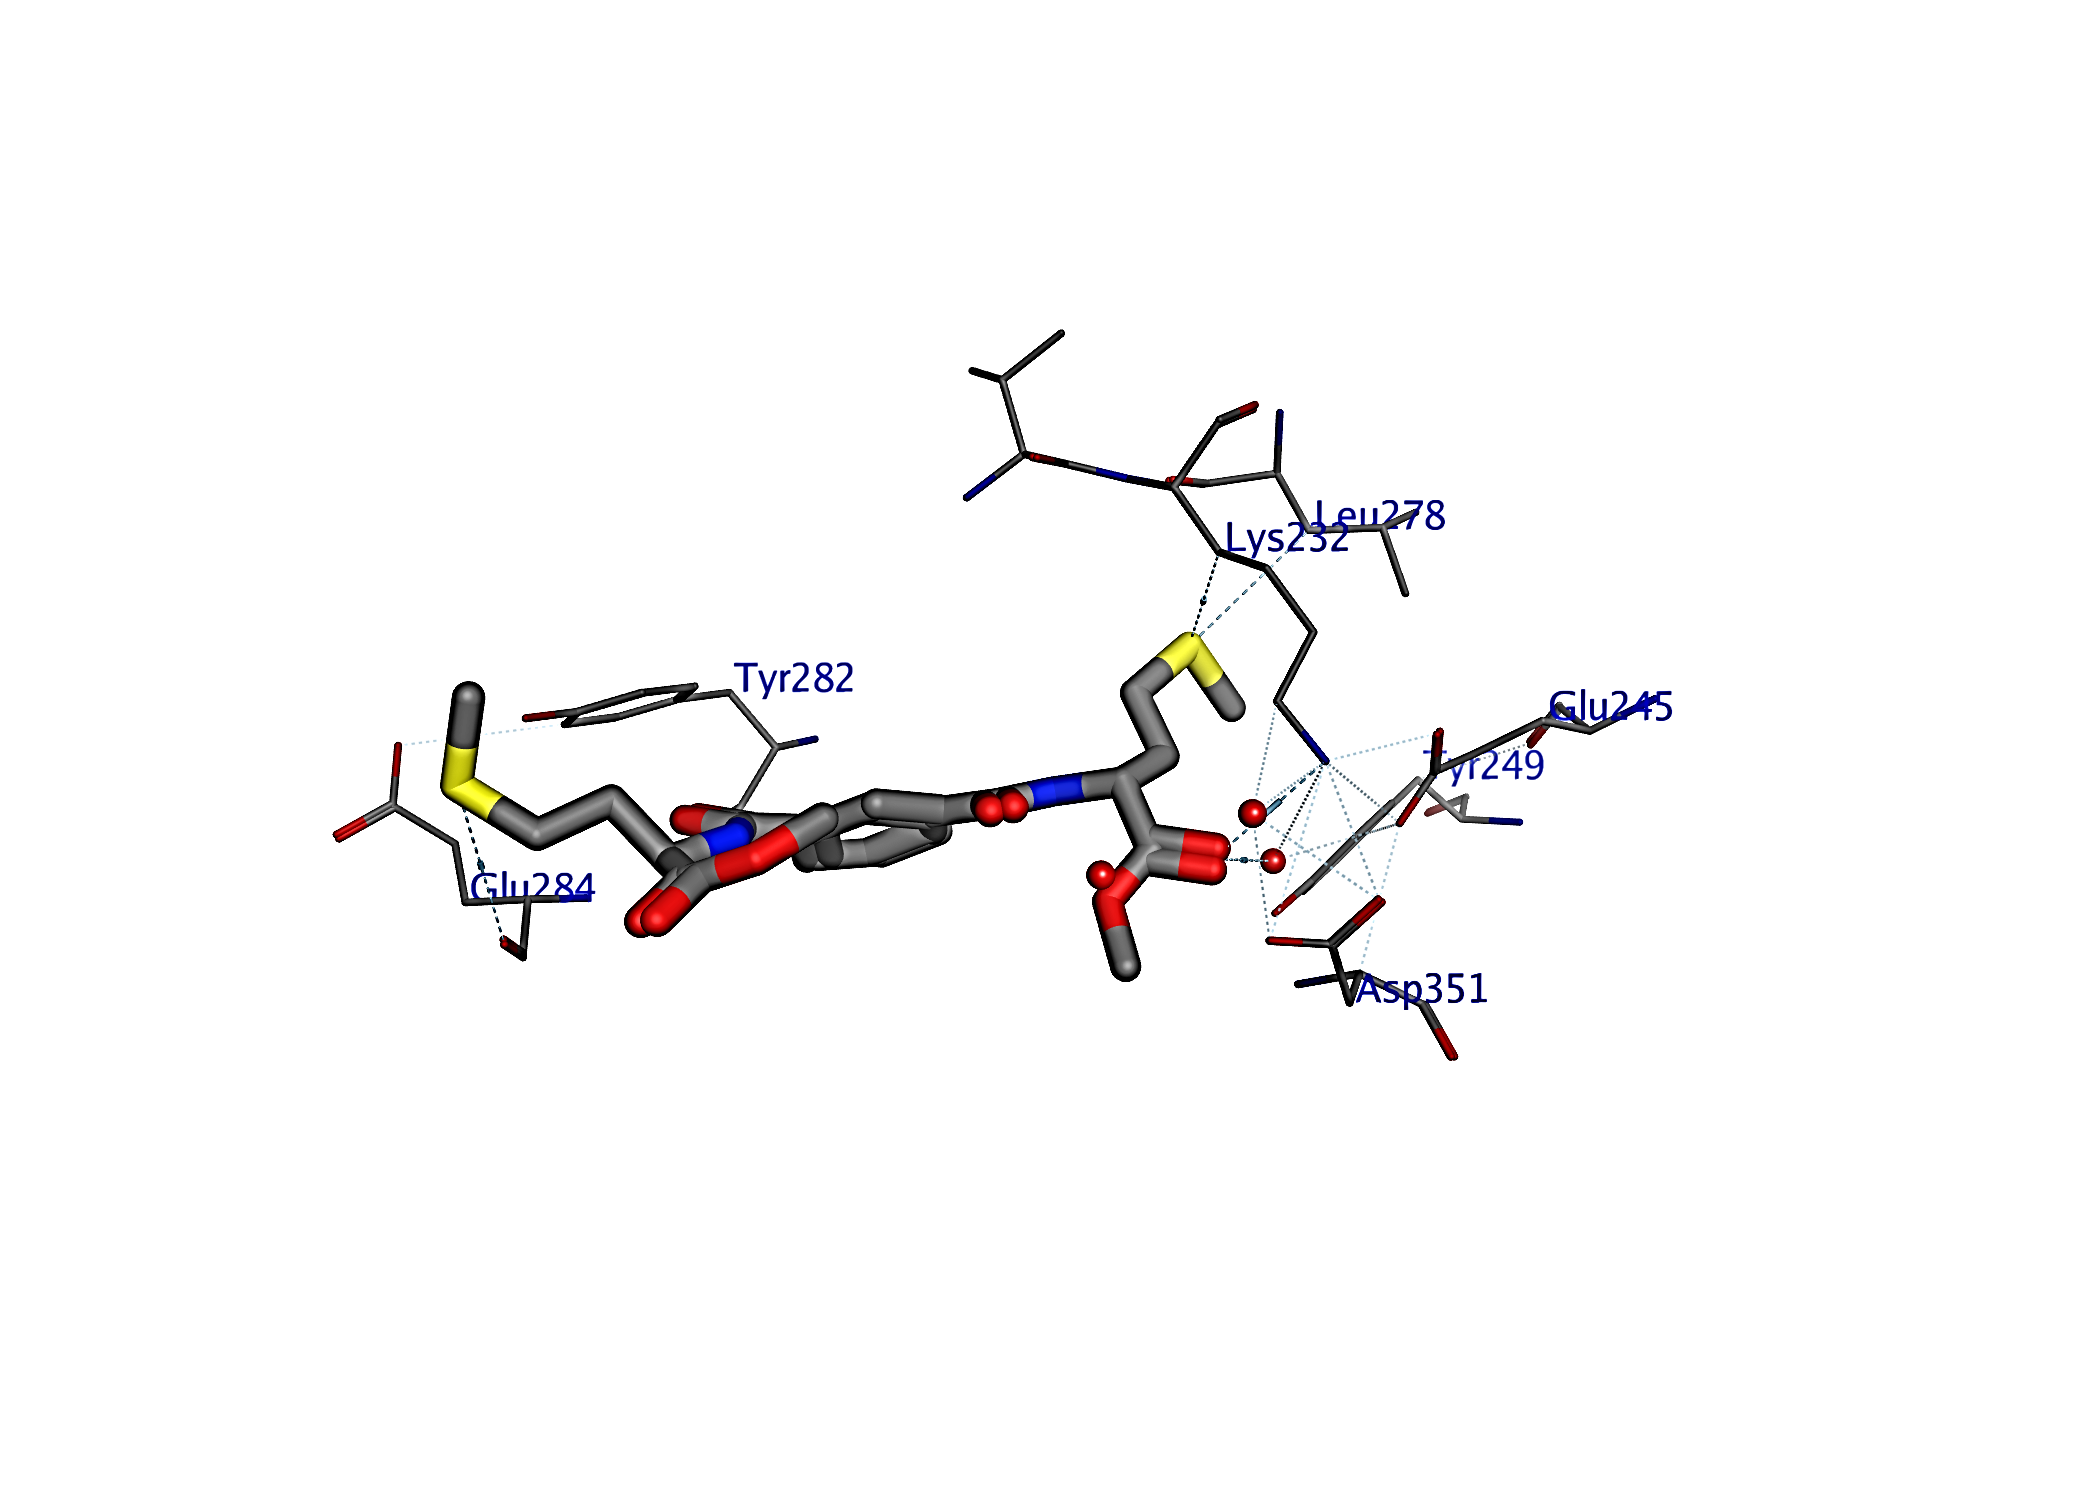


**6**


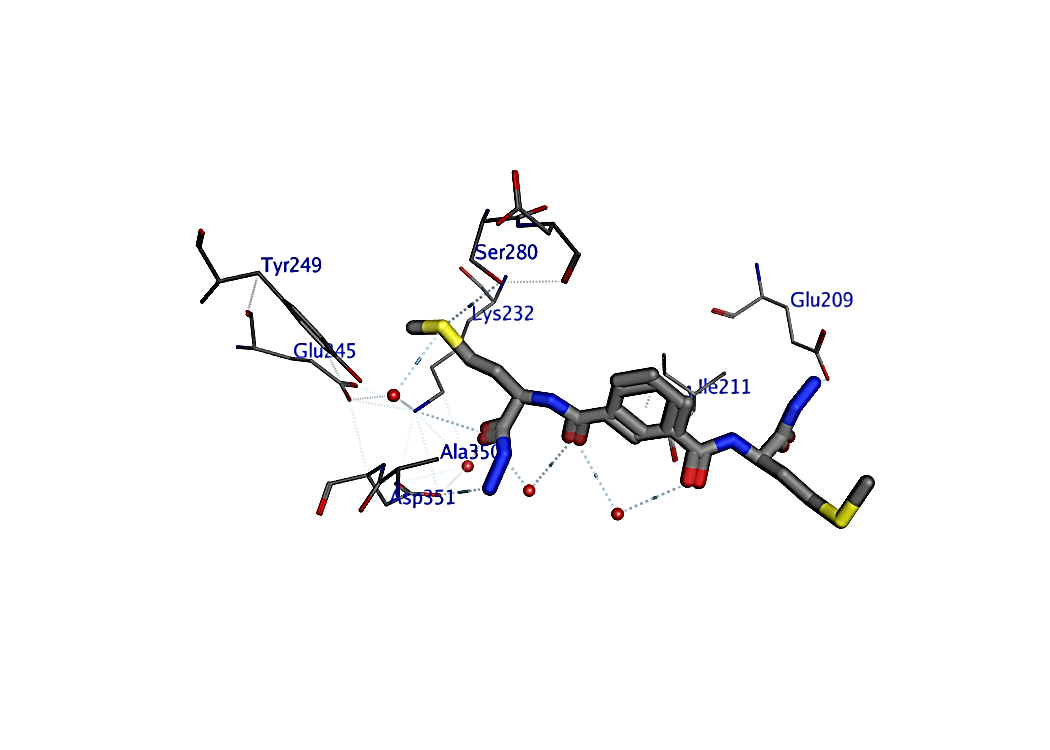


**8**

**Figure S1:** The binding mode of tested compoundsinto the activesite of 1EA1, H-bond represented as blue dashad color yellow dashed showed π- π interaction.


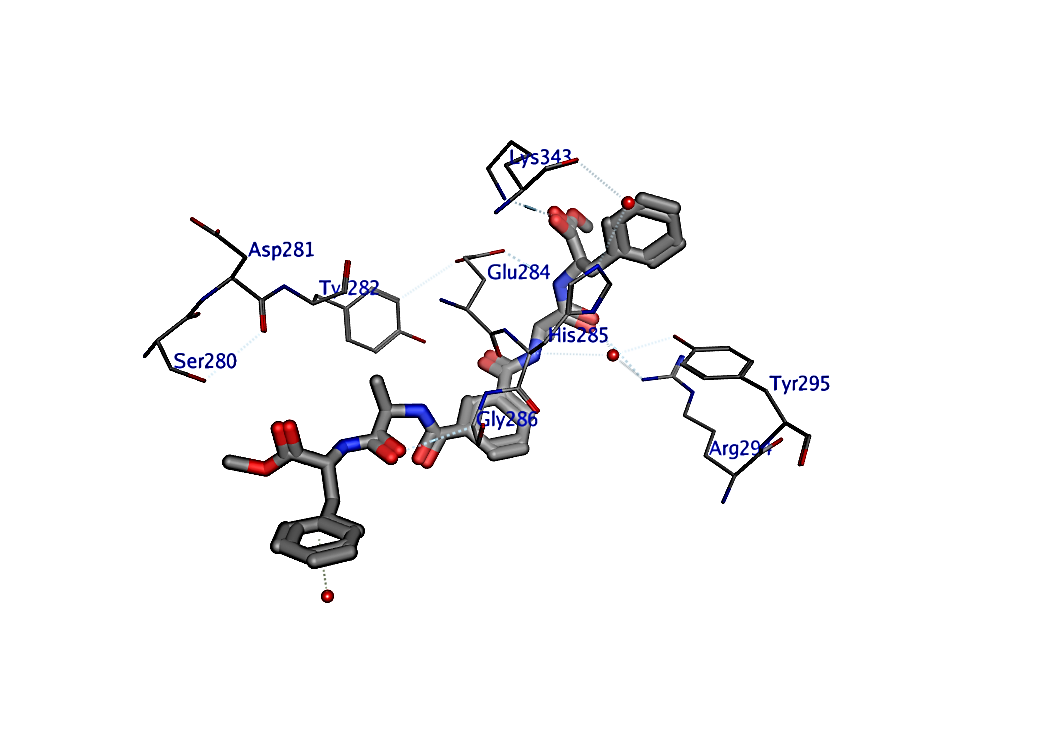


**9**


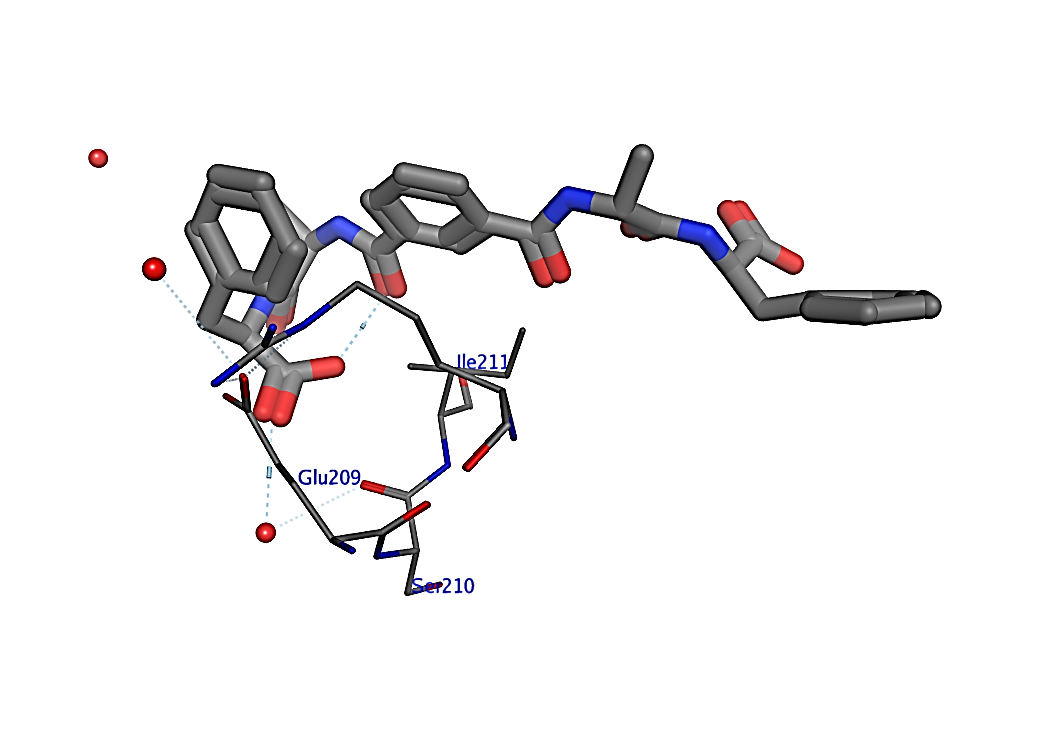


**10**


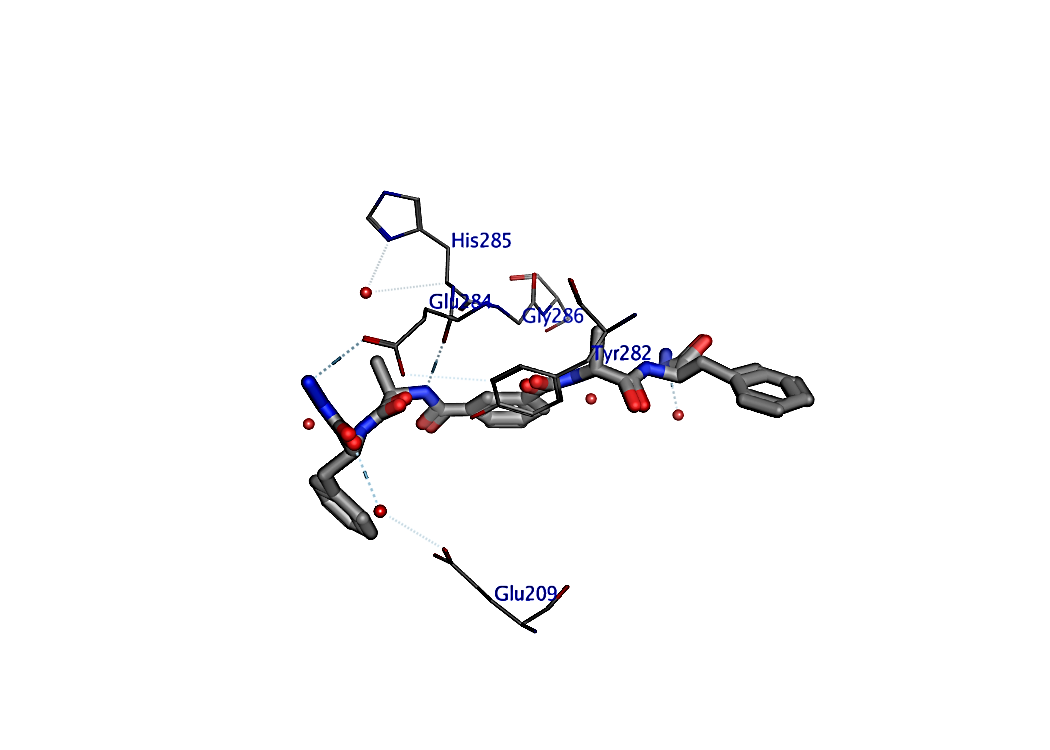


**11**

**Figure S2:** The binding mode of tested compoundsinto the activesite of 1EA1, H-bond represented as blue dashad color yellow dashed showed π- π interaction.


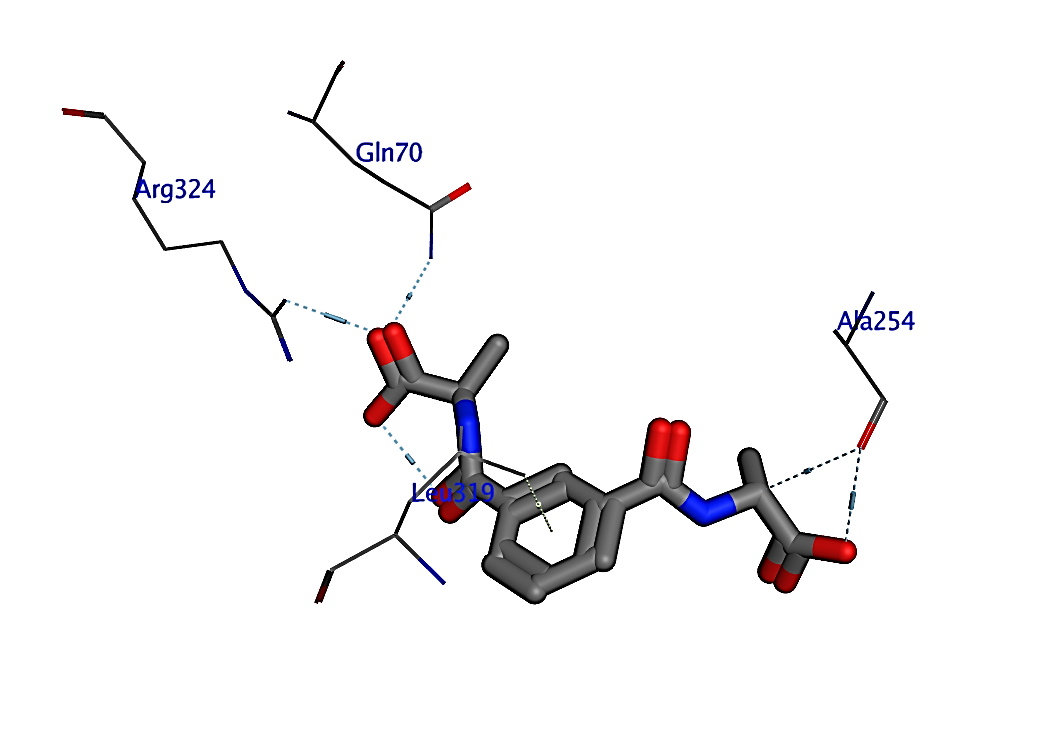


**3**


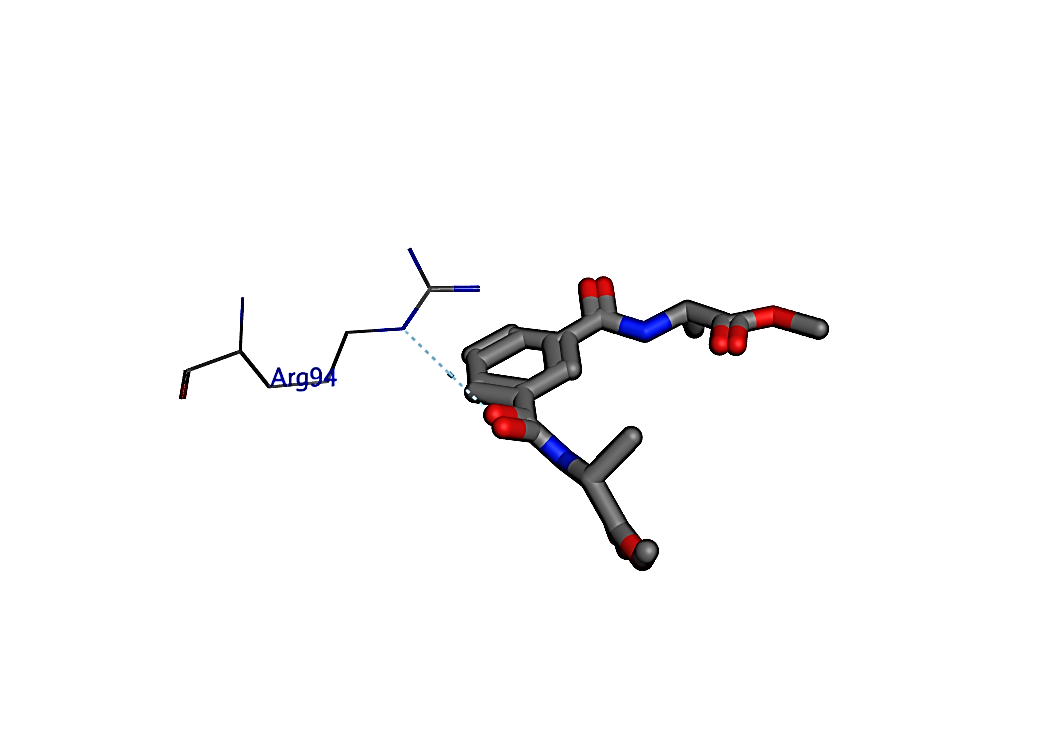


**5**


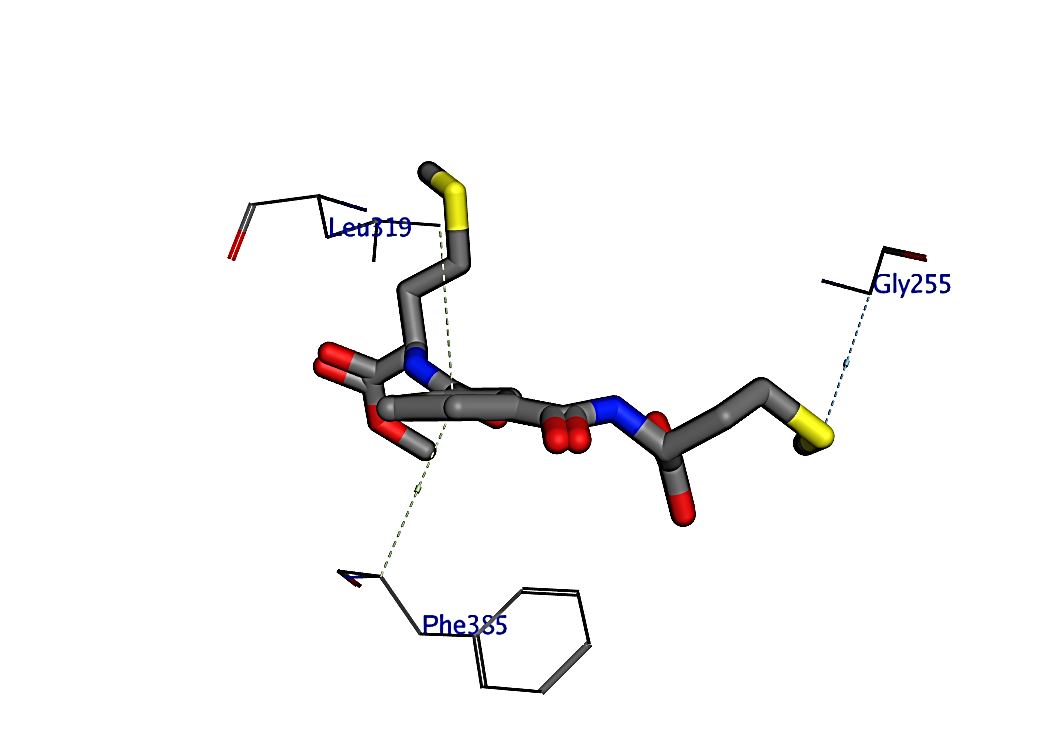


**6**


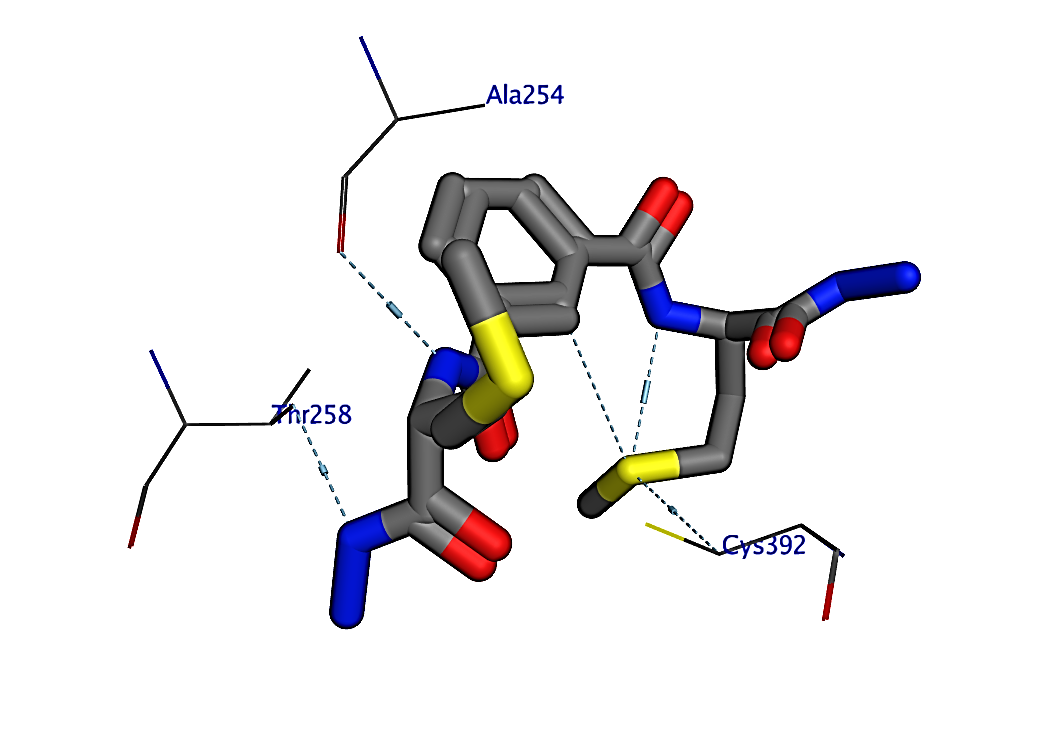


**8**


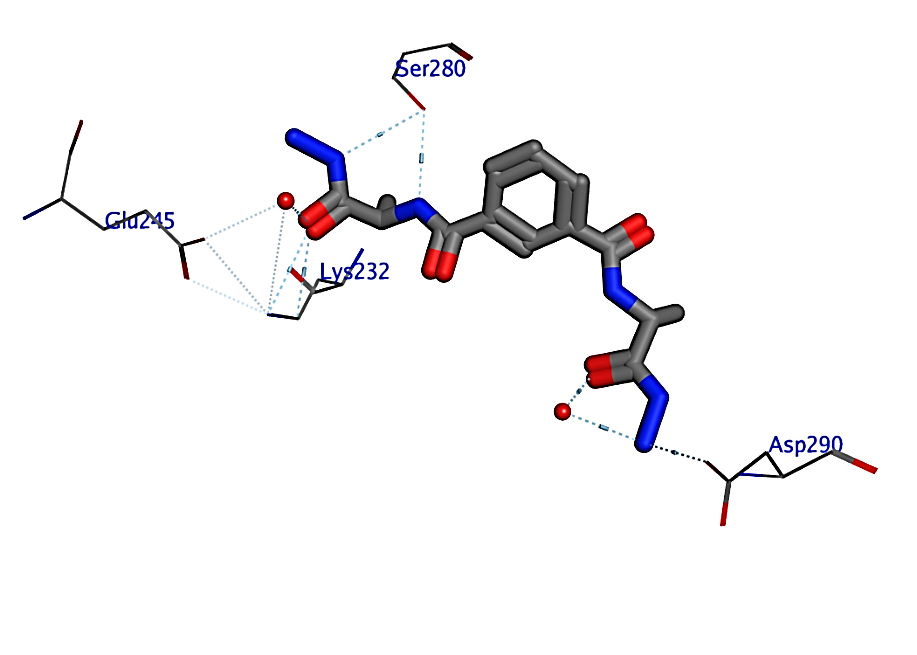


**7**

**Figure S3:** The binding mode of tested compoundsinto the activesite of 1VJY, H-bond represented as blue dashad color and yellow dashed showed π- π interaction.


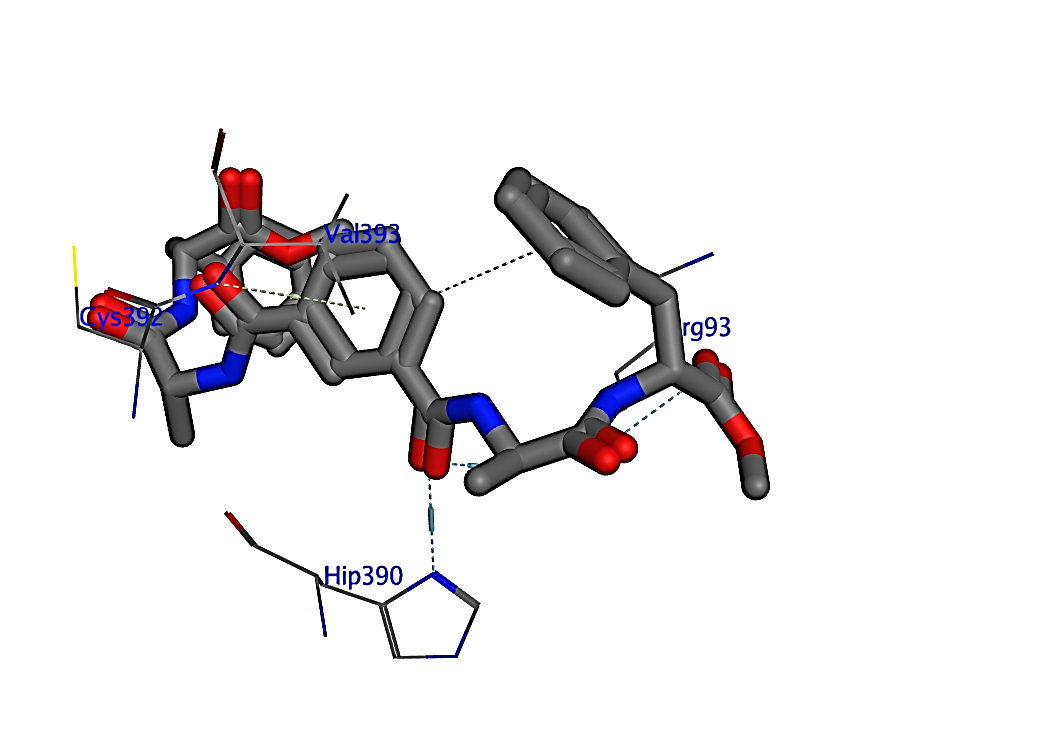


**10**


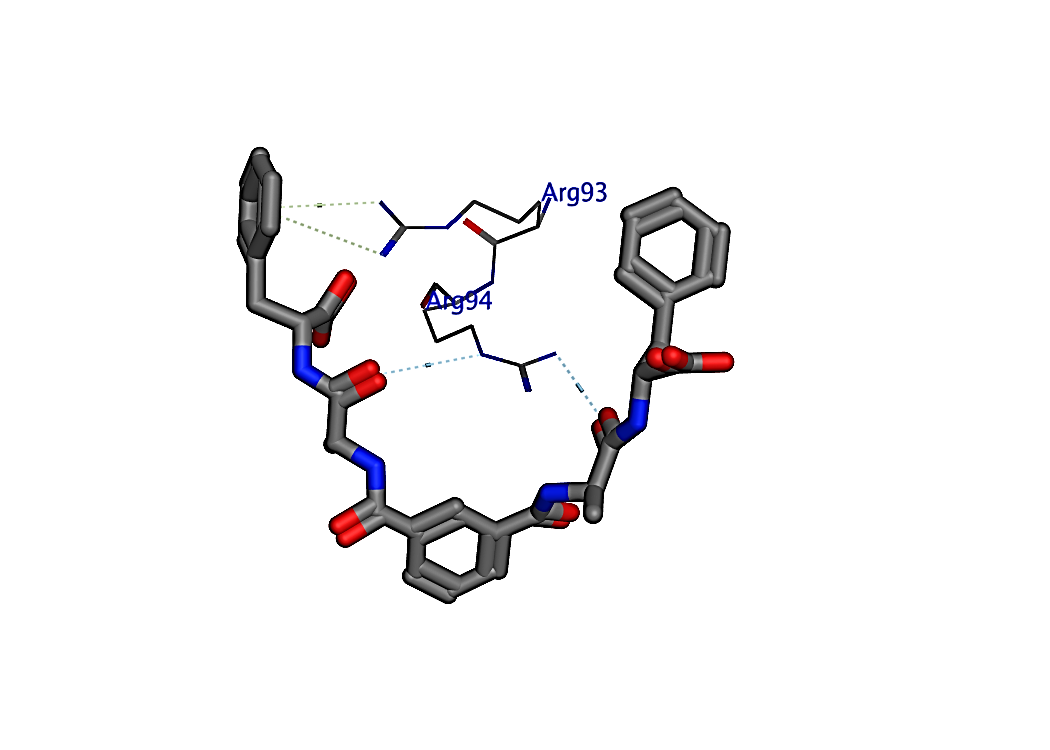


**9**


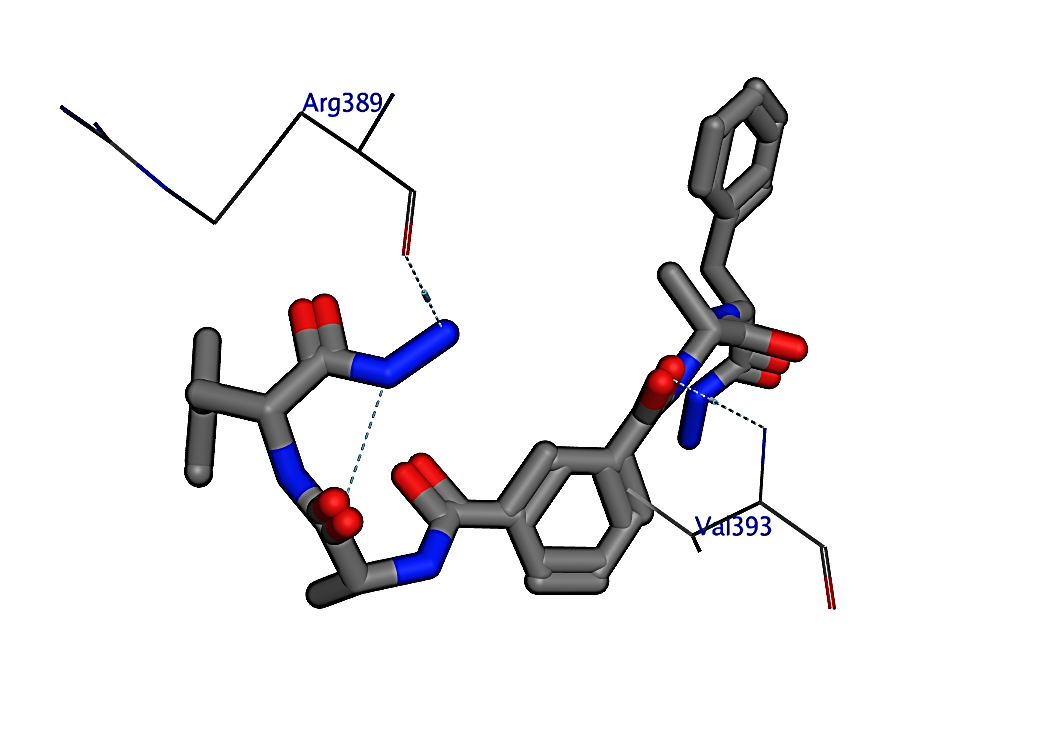


**11**

**Figure S4:** The binding mode of tested compoundsinto the activesite of 1VJY, H-bond represented as blue dashad color yellow dashed showed π- π interaction.

**Table (S1)**: Key interactions of the newly designed Ligands with active sites for (ID: 4uro) DNA Gyrase B :

| **Atom** | **Receptor** | | | **Interaction** | **Distance** | **E (kcal/mol)** |
| --- | --- | --- | --- | --- | --- | --- |
| **Compound (3)** | | | | | | |
| O10 | ALA | 64 |  | H-acceptor | 2.87 | -0.9 |
| **Compound (4)** | | | | | | |
| O10 | ALA | 64 |  | H-acceptor | 3.17 | -1.2 |
| O10 | ASN | 65 |  | H-acceptor | 3.56 | -0.7 |
| S25 | HOH | 2006 |  | H-acceptor | 3.7 | -1.5 |
| **Compound (5)** | | | | | | |
| O22 | THR | 171 |  | H-donor | 2.87 | -1.4 |
| O10 | ALA | 64 |  | H-acceptor | 2.87 | -0.9 |
| **Compound (6)** | | | | | | |
| O10 | ALA | 64 |  | H-acceptor | 2.86 | -1.1 |
| O10 | ASN | 65 |  | H-acceptor | 3.23 | -1.5 |
| S27 | HOH | 2006 |  | H-acceptor | 3.64 | -1.5 |
| **Compound (7)** | | | | | | |
| N24 | THR | 171 |  | H-donor | 2.25 | 45.2 |
| O10 | ALA | 64 |  | H-acceptor | 2.87 | -0.9 |
| **Compound (8)** | | | | | | |
| N30 | THR | 171 |  | H-donor | 2.36 | 18.5 |
| O10 | ALA | 64 |  | H-acceptor | 2.86 | -1.1 |
| O10 | ASN | 65 |  | H-acceptor | 3.23 | -1.5 |
| S27 | HOH | 2006 |  | H-acceptor | 3.64 | -1.5 |
| **Compound (9)** | | | | | | |
| O45 | THR | 171 |  | H-acceptor | 3.38 | -1.2 |
| O45 | THR | 171 |  | H-acceptor | 3.07 | -0.8 |
| **Compound (10)** | | | | | | |
| O44 | THR | 171 |  | H-acceptor | 3.38 | -1.2 |
| O44 | THR | 171 |  | H-acceptor | 3.07 | -0.8 |
| **Compound (11)** | | | | | | |
| O45 | THR | 171 |  | H-acceptor | 3.38 | -1.4 |
| O45 | THR | 171 |  | H-acceptor | 3.07 | -0.9 |
| N46 | THR | 171 |  | H-acceptor | 2.28 | 736.7 |

**Table (S2)**: Key interactions of the newly designed Ligands with active sites for **(ID:1EA1) Candida albicans lanosterol 14-α-demethylase**

| **Atom** | **Receptor** | **Interaction** | **Distance** | **E (kcal/mol)** |
| --- | --- | --- | --- | --- |
| **3** | | | | |
| C17 | ALA254 | H-donor | 3.2 | -0.8 |
| C20 | HIP390 | H-donor | 3.36 | -0.7 |
| O37 | ALA254 | H-donor | 2.94 | -3.2 |
| O34 | GLN70 | H-acceptor | 3.15 | -0.7 |
| O34 | TYR74 | H-acceptor | 3.09 | -1.2 |
| O34 | ARG324 | H-acceptor | 2.94 | -5.1 |
| 6-ring | LEU319 | pi-H | 4.05 | -0.6 |
| **7** | | | | |
| O16 | THR  258 | H-acceptor | 2.95 | -0.7 |
| O34 | SER  259 | H-acceptor | 2.8 | -1.8 |
| **8** | | | | |
| N15 | ALA254 | H-donor | 2.89 | -1.8 |
| N33 | THR258 | H-donor | 2.79 | -0.7 |
| S40 | GLY394 | H-donor | 3.81 | -0.9 |
| S40 | GLY394 | H-acceptor | 3.72 | -0.9 |
| S48 | CYS392 | H-acceptor | 3.58 | -0.8 |
| 9 | | | | |
| NH133 | ARG94 | H-acceptor | 2.69 | -1.8 |
| NE 34 | ARG94 | H-acceptor | 3.48 | -0.8 |
| N 78 | TYR74 | H-acceptor | 2.88 | -2.2 |
| 6-ring | ARG 93 | pi-cation | 3.73 | -1.2 |
| 6-ring | ARG94 | pi-cation | 4.31 | -0.5 |
| 10 | | | | |
| O14 | ARG93 | H-acceptor | 2.9 | -1.9 |
| O14 | HIP390 | H-acceptor | 3.08 | -7.5 |
| O80 | ARG93 | H-acceptor | 3.07 | -0.5 |
| 6-ring | VAL 393 | pi-H | 4.22 | -0.9 |
| 11 | | | | |
| N57 | ARG389 | H-donor | 2.98 | -1.9 |
| O14 | VAL393 | H-acceptor | 3.49 | -0.7 |

**Table (S3)**: Key interactions of the newly designed Ligands with active sites **(ID: 1VJY) transforming growth factor (TGF) for β-receptor type I (β-RI):**

| Atom | Receptor | Interaction | Distance A° | E (kcal/mol) |
| --- | --- | --- | --- | --- |
| **Compound 3** | | | | |
| N15 | HOH1001 | H-donor | 3.39 | -1.3 |
| O14 | HOH1028 | H-acceptor | 2.87 | -1.9 |
| O34 | SER280 | H-acceptor | 3.44 | -0.7 |
| **Compound** 5 | | | | |
| S44 | GLU284 | H-donor | 3.91 | -0.6 |
| O32 | LYS232 | H-acceptor | 2.92 | -8.7 |
| O32 | HOH1001 | H-acceptor | 2.95 | -0.9 |
| S36 | LYS232 | H-acceptor | 3.7 | -0.6 |
| S36 | LEU278 | H-acceptor | 3.5 | -0.5 |
| **Compound** 6 | | | | |
| N15 | SER280 | H-donor | 3.15 | -2.1 |
| N35 | SER280 | H-donor | 3.27 | -1.1 |
| N42 | ILE211 | H-donor | 2.93 | -2.3 |
| N42 | ASP290 | H-donor | 2.95 | -1.1 |
| O14 | HIS283 | H-acceptor | 3.6 | -0.5 |
| O33 | HOH1028 | H-acceptor | 2.81 | -1.1 |
| O34 | LYS232 | H-acceptor | 3 | -1.7 |
| O34 | LYS232 | H-acceptor | 3.17 | -0.6 |
| O34 | HOH1001 | H-acceptor | 2.9 | -1.3 |
| N42 | HOH1028 | H-acceptor | 3.02 | -1.5 |
| **Compound** 7 | | | | |
| S40 | SER280 | H-donor | 3.62 | -0.7 |
| N53 | ASP351 | H-donor | 2.96 | -3.6 |
| N56 | GLU209 | H-donor | 3.28 | -0.5 |
| O14 | HOH1028 | H-acceptor | 3.49 | -1 |
| O16 | HOH1028 | H-acceptor | 3.58 | -0.6 |
| O16 | HOH1030 | H-acceptor | 3.54 | -0.9 |
| O32 | LYS232 | H-acceptor | 3.53 | -0.5 |
| O32 | HOH1030 | H-acceptor | 3.28 | -0.7 |
| O32 | HOH1050 | H-acceptor | 2.99 | -2.3 |
| S40 | SER280 | H-acceptor | 3.62 | -1.3 |
| S40 | HOH1001 | H-acceptor | 3.38 | -1.5 |
| S48 | HOH1007 | H-acceptor | 4.03 | -0.8 |
| 6-ring | ILE211 | pi-H | 3.75 | -1.1 |
| **Compound** 9 | | | | |
| O78 | HOH1031 | H-acceptor | 3.23 | -1.9 |
| **Compound** 10 | | | | |
| N15 | HIS283 | H-donor | 3.2 | -0.5 |
| N60 | GLU284 | H-donor | 2.91 | -3.9 |
| O33 | ARG294 | H-acceptor | 3.44 | -2.6 |
| O34 | GLY286 | H-acceptor | 3.4 | -1.3 |
| O80 | LYS343 | H-acceptor | 3.09 | -5.3 |
| 6-ring | HOH1030 | pi-H | 3.24 | -0.5 |
| **Compound** 11 | | | | |
| N15 | GLU284 | H-donor | 3.02 | -4.5 |
| N57 | GLU284 | H-donor | 3.03 | -2.9 |
| O56 | HOH1111 | H-acceptor | 3.05 | -2.3 |
| N82 | HOH1030 | H-acceptor | 2.95 | -1.2 |

**Compound 3**

**
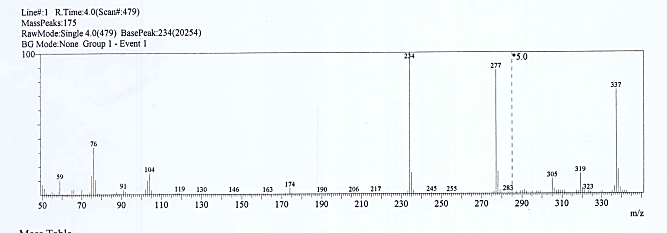
**


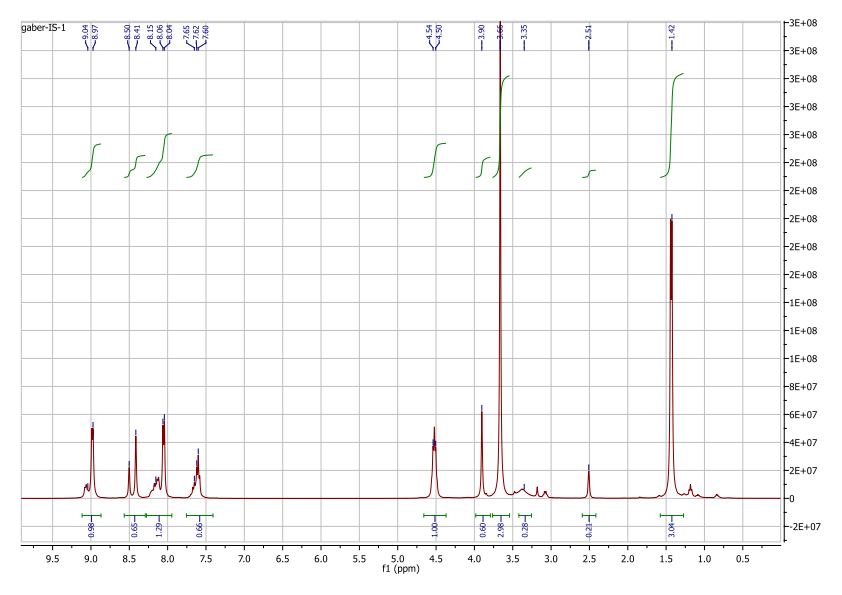


**Compound 4**


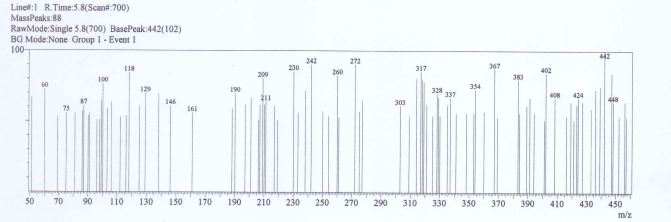


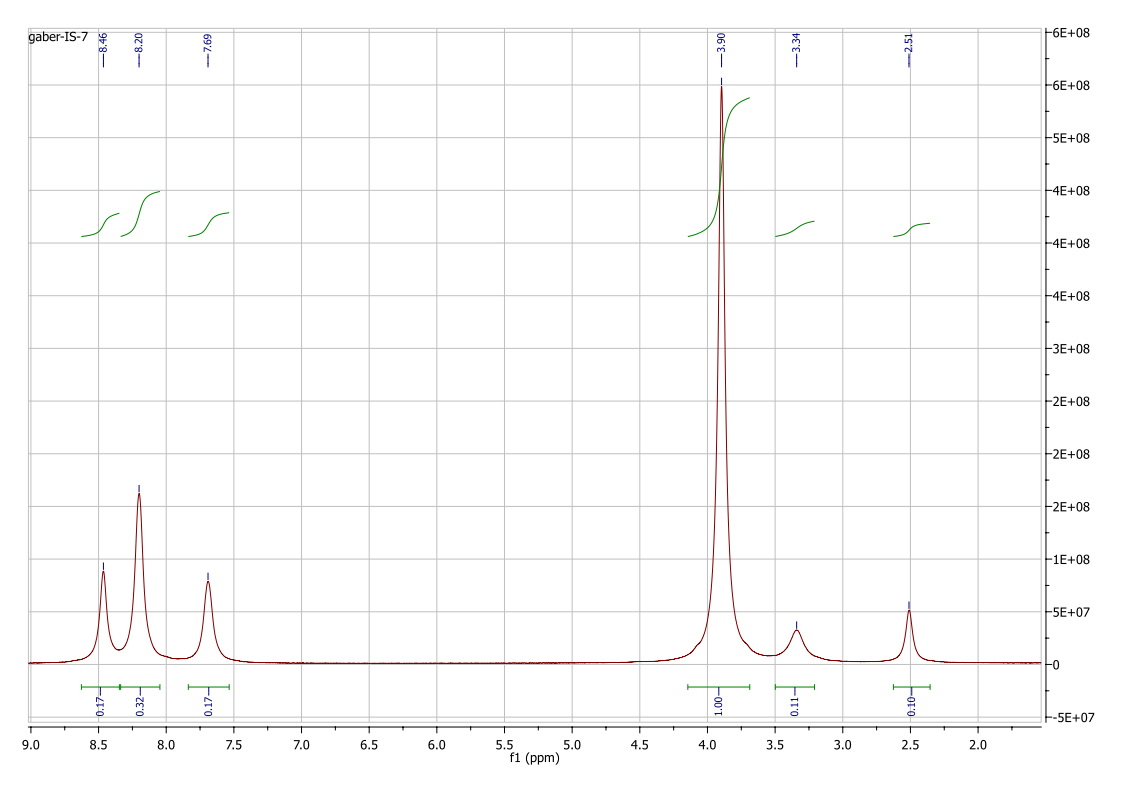


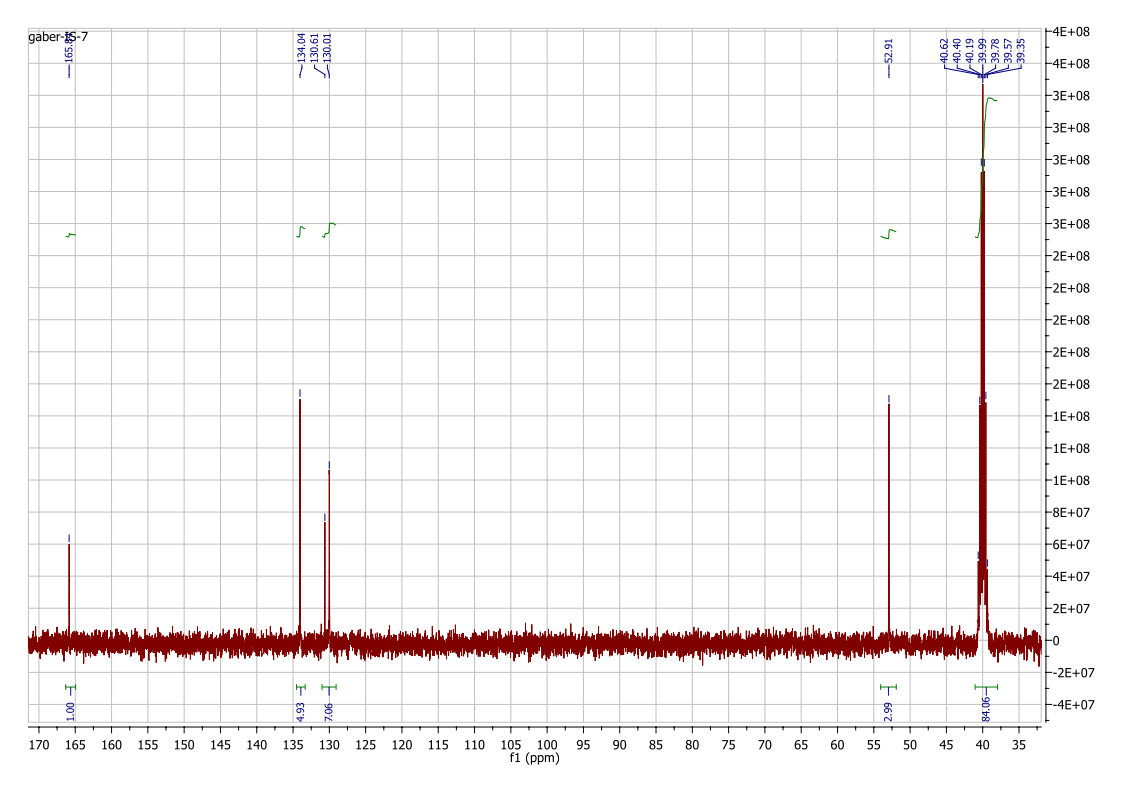


**Compound 5**


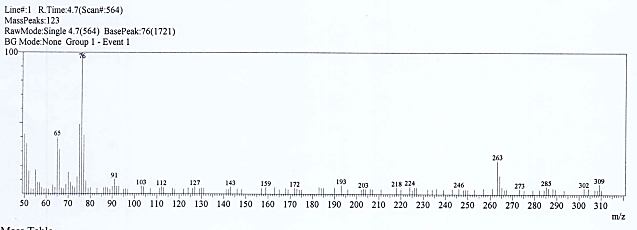


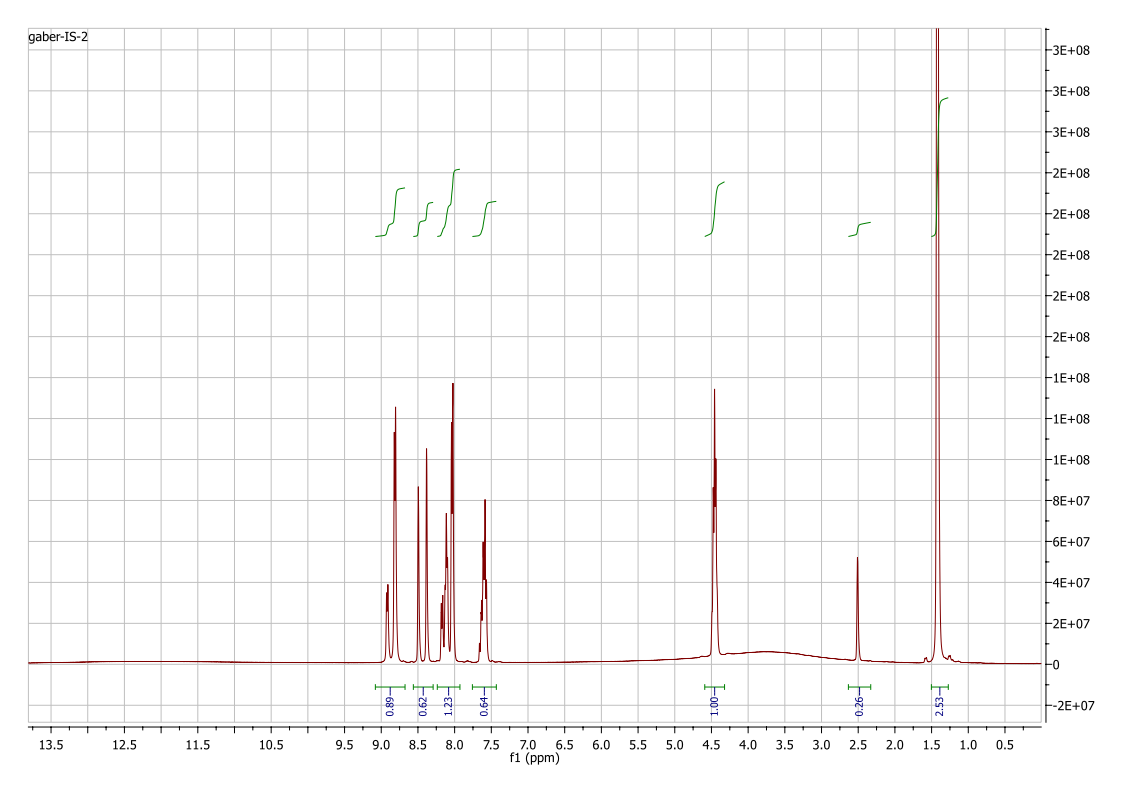

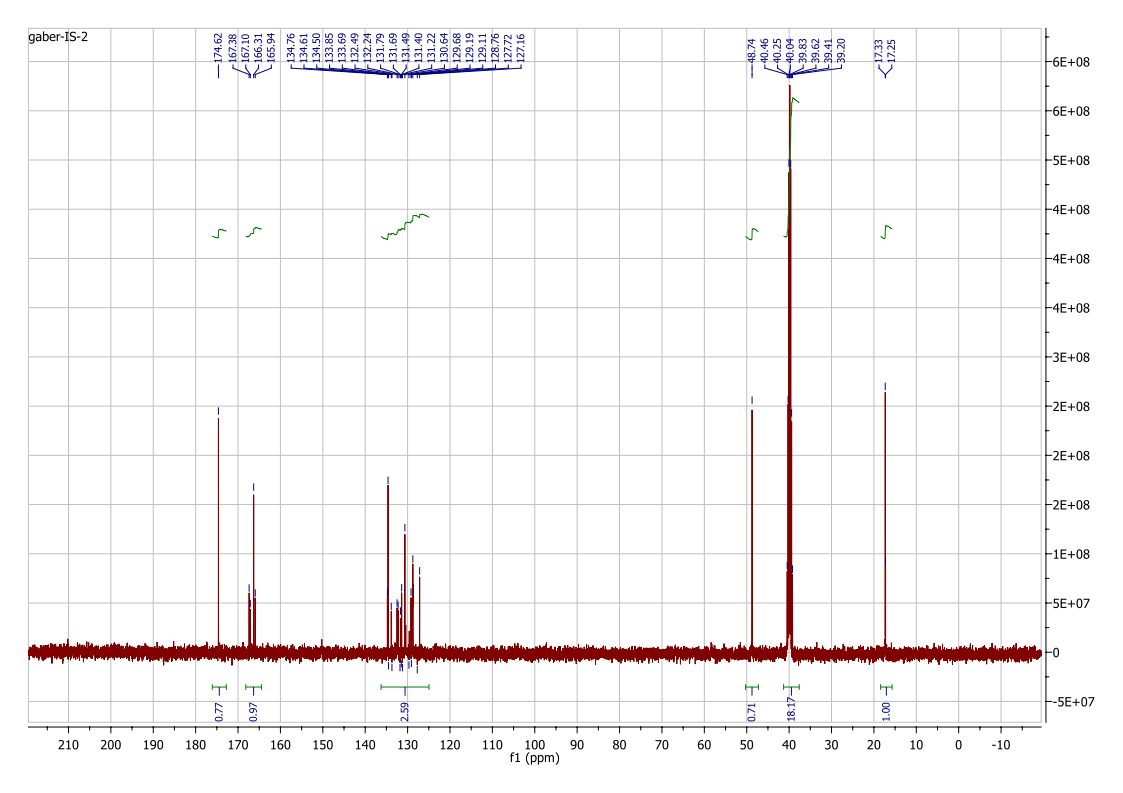


**Compound 6**


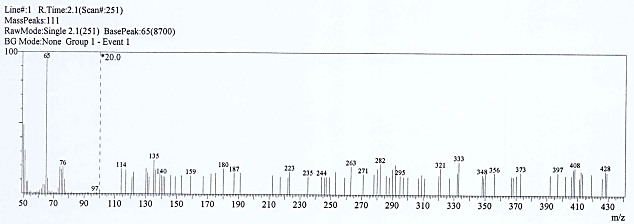

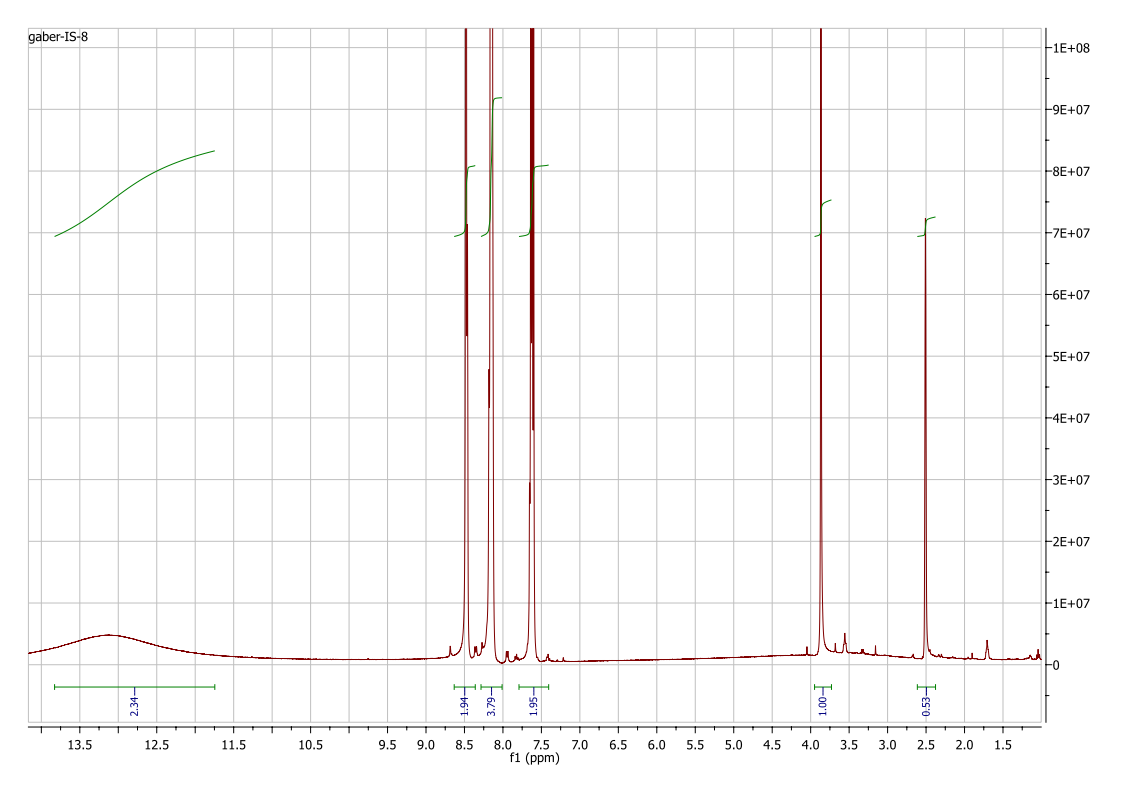

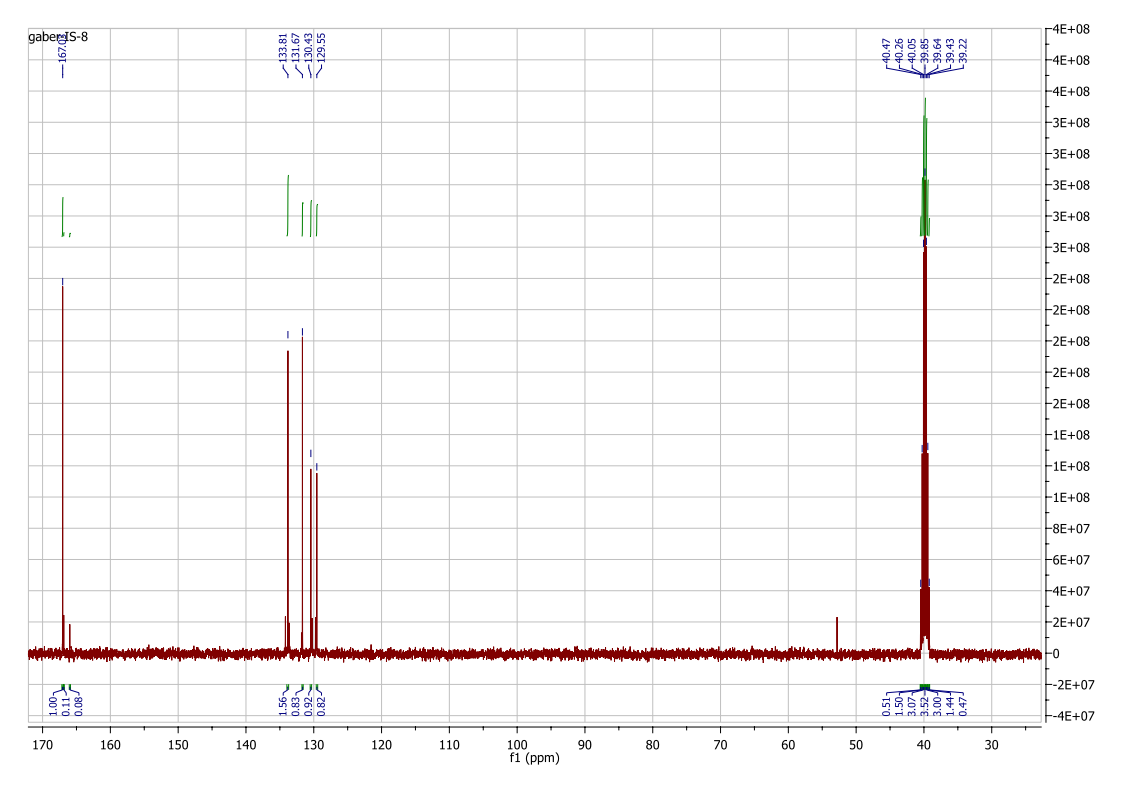


**Compound 7**


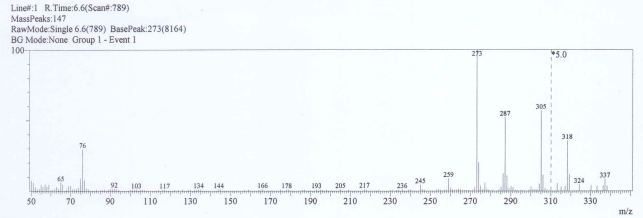


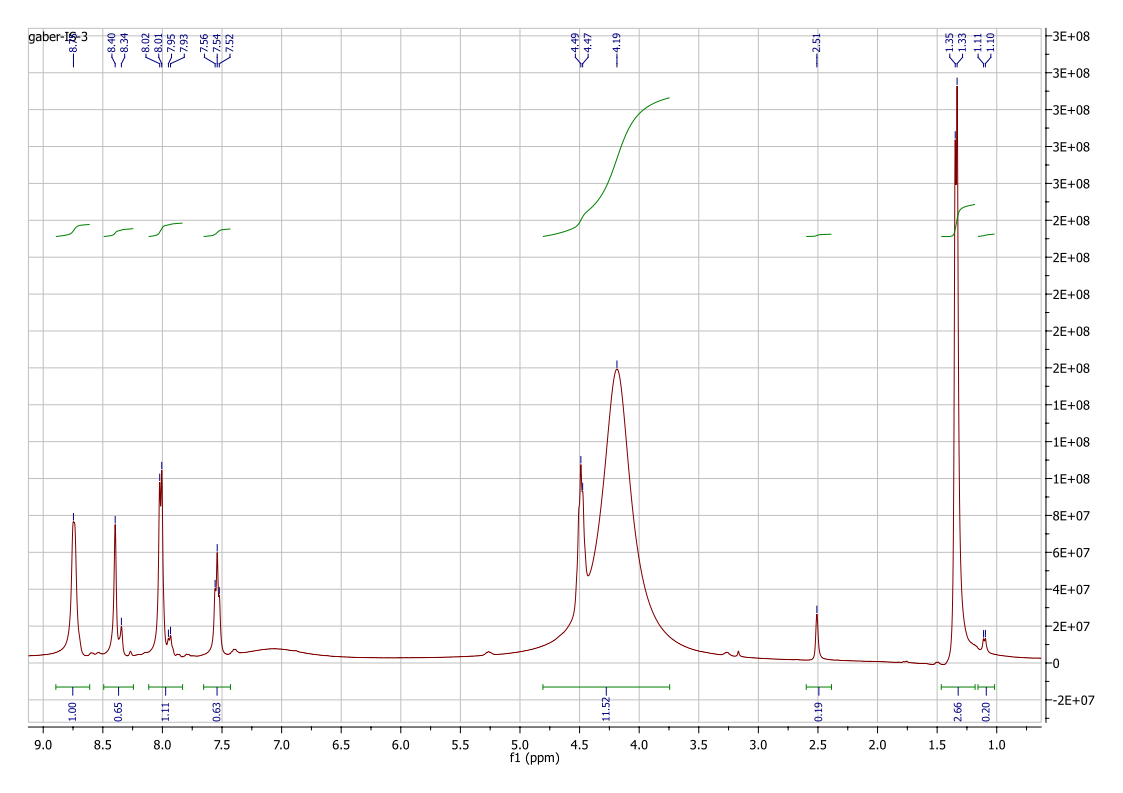


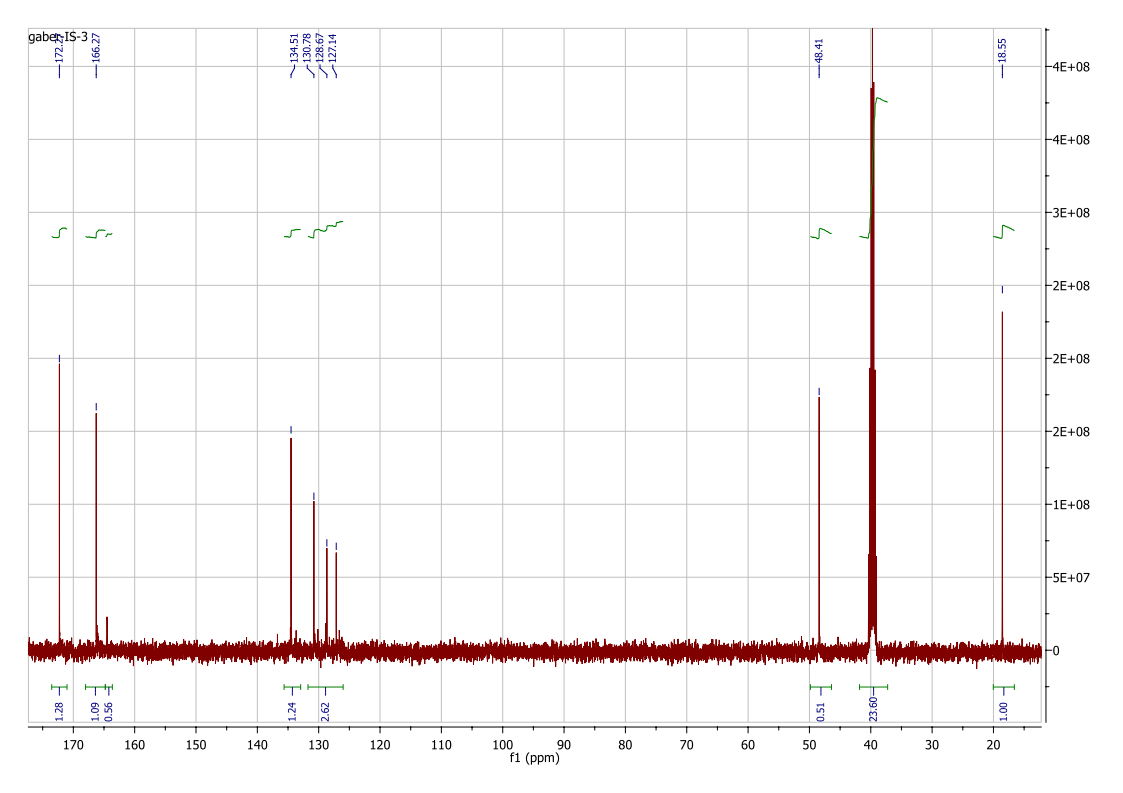


**Compound 8**


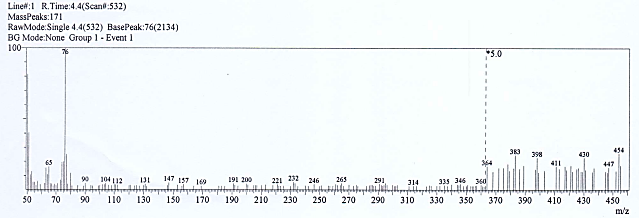


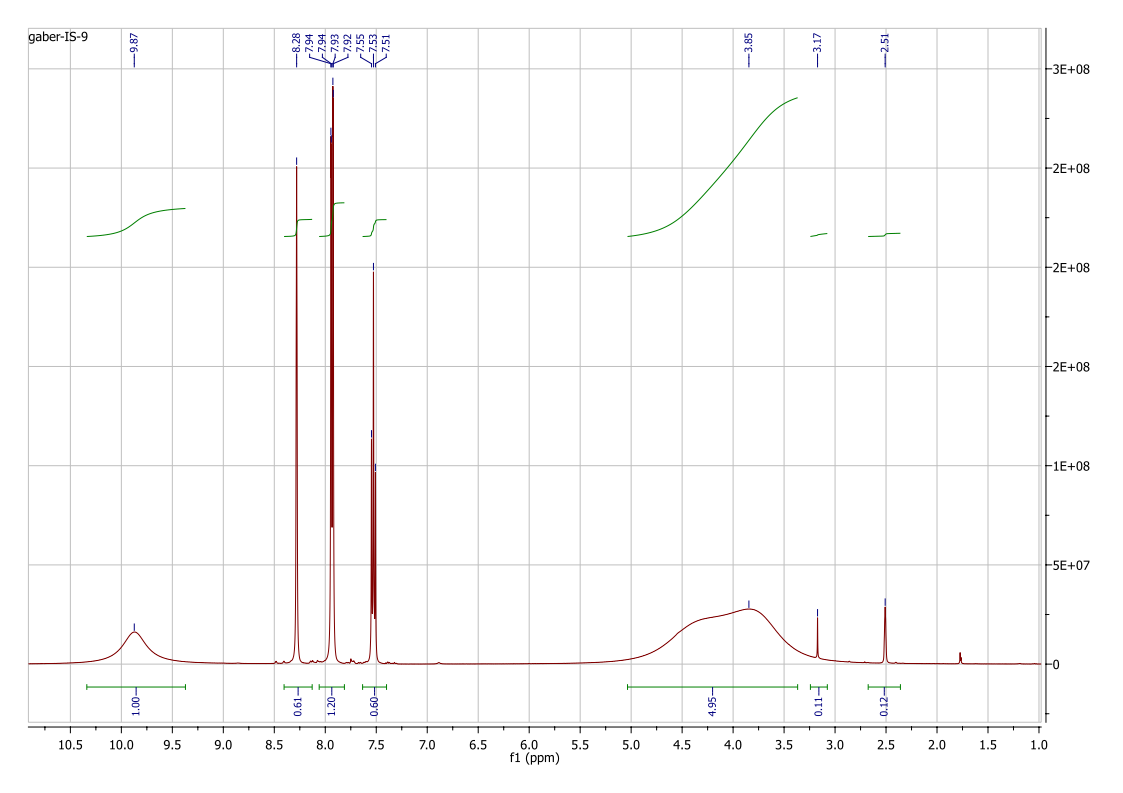


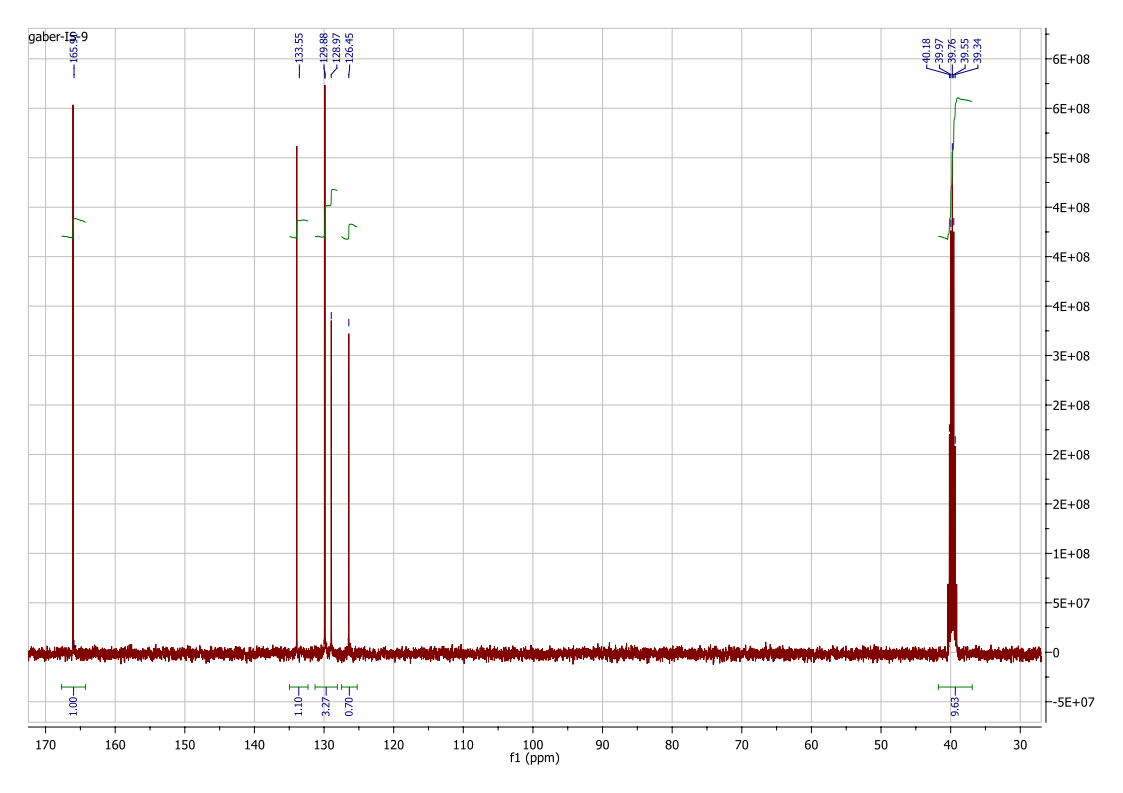


**Compound 9**


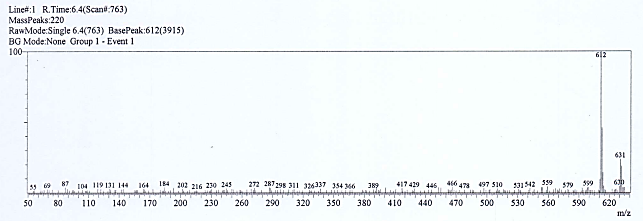


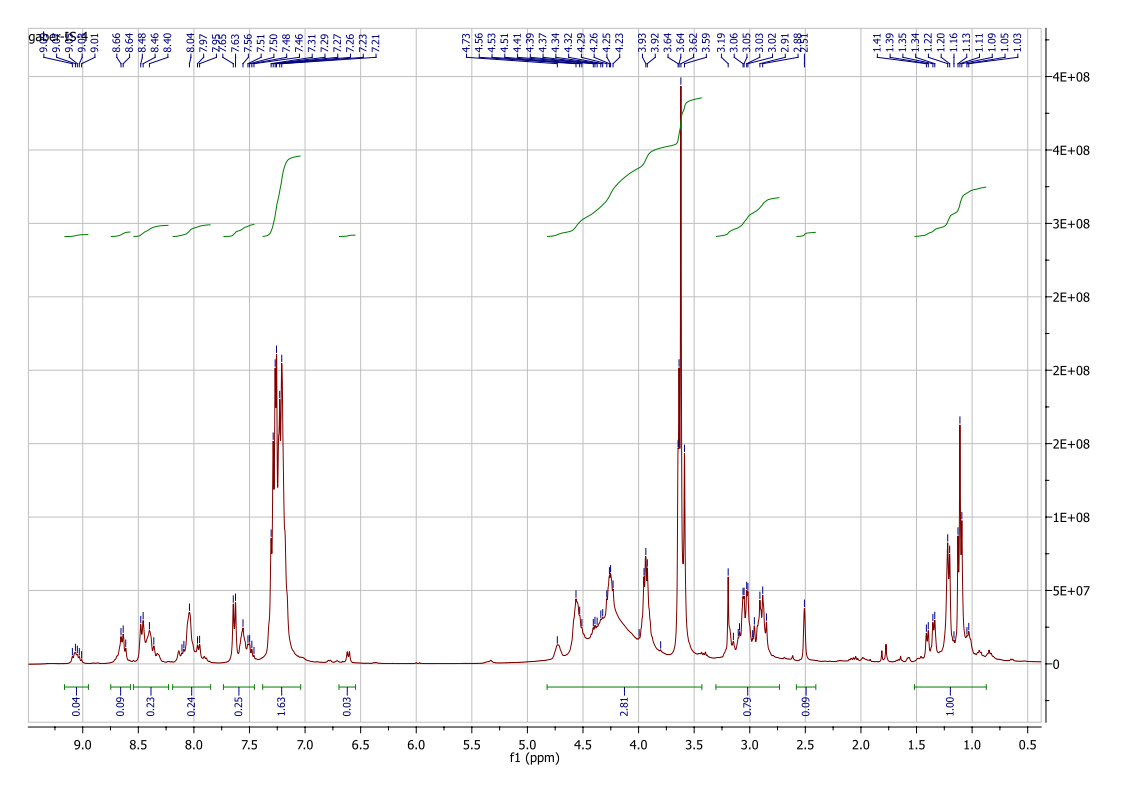


**Compound 10**


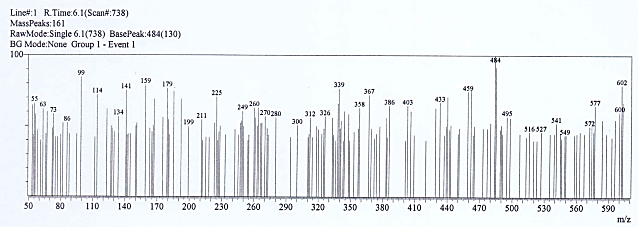

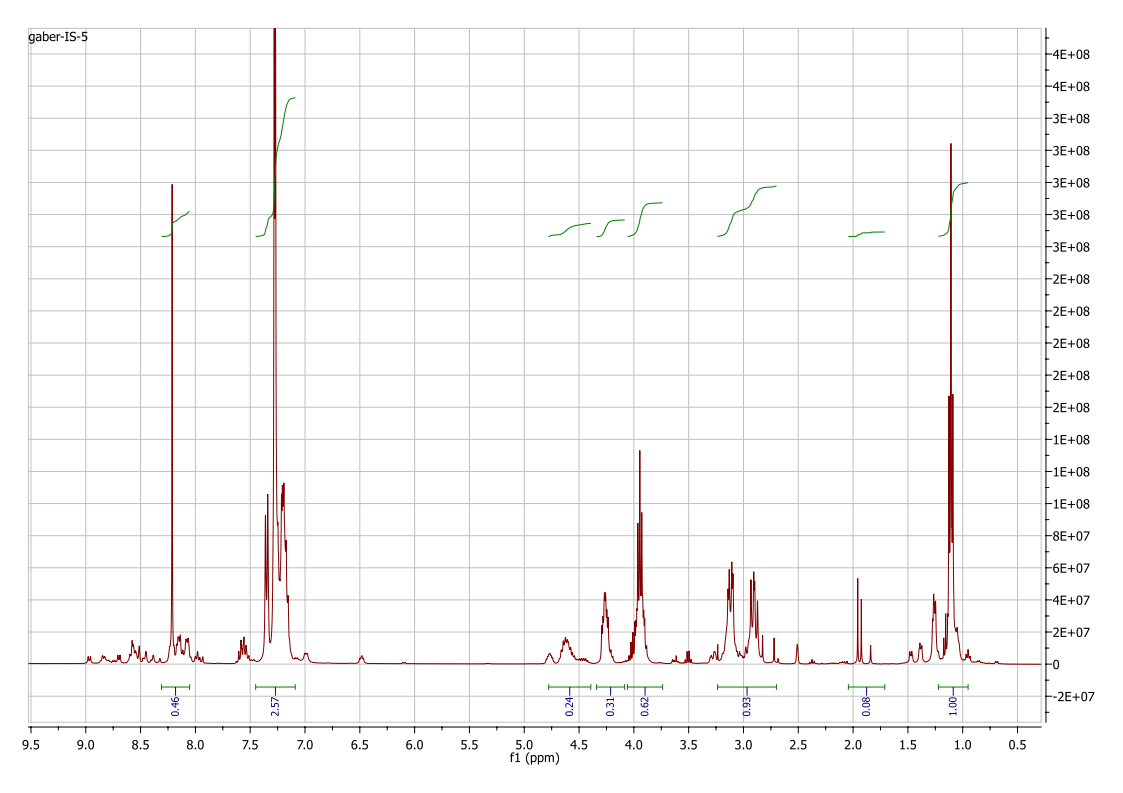


**Compound 11**


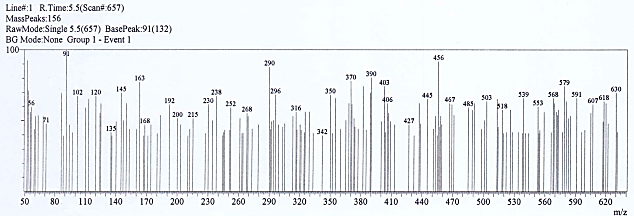

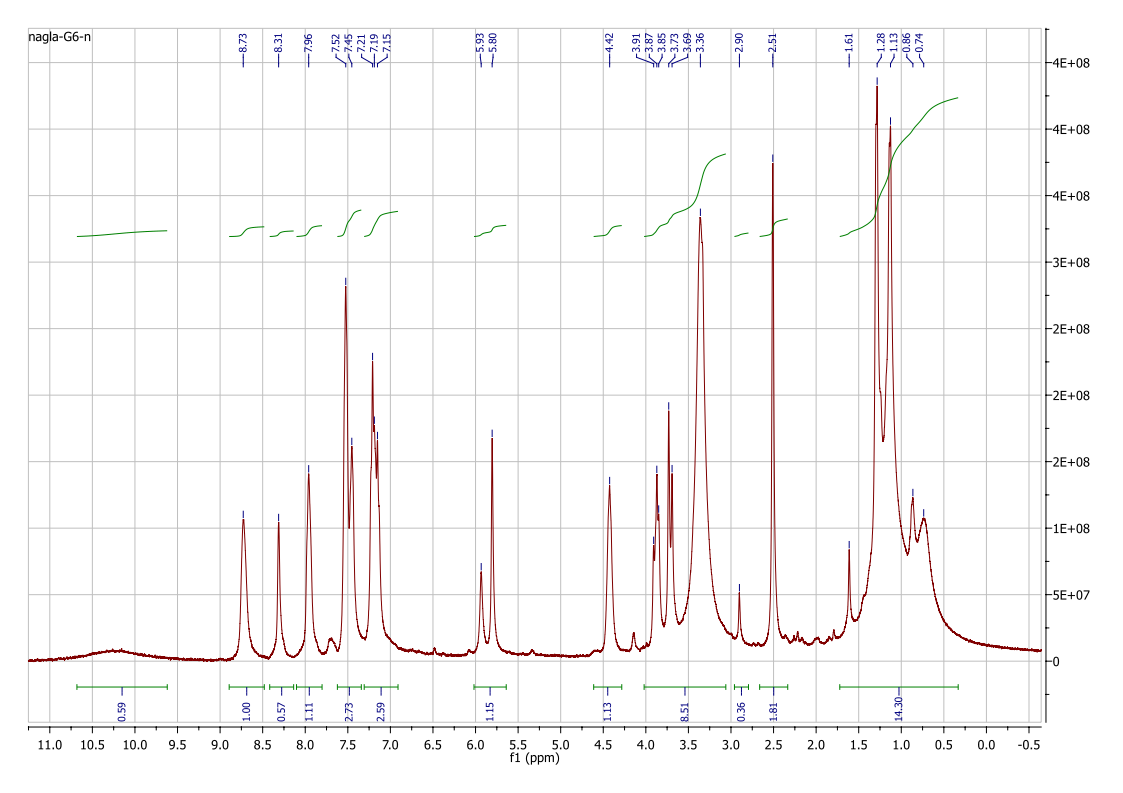

Supplement: Supplementary file 1 [file get_supplementary_file.php]
